# Supplementary material for: Role of KRAS-LCS6 polymorphism in advanced NSCLC patients treated with erlotinib or docetaxel in second line treatment (TAILOR)
Source: PubMed Central journal article supplement (PMC4648064; doi:10.1038/srep16331), 2015-11-17

## **Role of KRAS-LCS6 polymorphism in advanced NSCLC patients treated with erlotinib or docetaxel in second line treatment (TAILOR)**

Monica Ganzinelli<sup>1</sup>, Eliana Rulli<sup>2</sup>, Elisa Caiola<sup>2</sup>, Marina Chiara Garassino<sup>1</sup>, Massimo Broggin<sup>2</sup>, Elena Copreni<sup>2</sup>, Sheila Piva<sup>3</sup>, Flavia Longo<sup>4</sup>, Roberto Labianca<sup>5</sup>, Claudia Bareggi<sup>6</sup>, Maria Agnese Fabbri<sup>7</sup>, Olga Martelli<sup>8</sup>, Daniele Fagnani<sup>9</sup>, Maria Cristina Locatelli<sup>10</sup>, Alessandro Bertolini<sup>11</sup>, Giuseppe Valmadre<sup>12</sup>, Ida Pavese<sup>13</sup>, Anna Calcagno<sup>14</sup>, Maria Giuseppa Sarobba<sup>15</sup> and Mirko Marabese<sup>2\*</sup>

<sup>1</sup>Oncology Department, Fondazione IRCCS Istituto Nazionale dei Tumori, Milan, Italy;

<sup>2</sup>Oncology Department, IRCCS - Istituto di Ricerche Farmacologiche Mario Negri, Italy;

<sup>3</sup>Oncology Department, Ospedale Fatebenefratelli e Oftalmico, Milan, Italy;

<sup>4</sup>Medical Oncology Department, Policlinico Umberto I Rome, Italy;

<sup>5</sup>Oncology Department, Papa Giovanni XXIII Hospital, Bergamo, Italy;

<sup>6</sup>Medical Oncology, Fondazione IRCCS Ca' Granda - Ospedale Maggiore Policlinico, Milano, Italy

<sup>7</sup>Medical Oncology Department, Ospedale Belcolle, Viterbo, Italy.

<sup>8</sup>Medical Oncology Department, San Giovanni e Addolorata Hospital, Rome, Italy

<sup>9</sup>Oncology Department, Azienda Ospedaliera Desio e Vimercate, Vimercate, Italy

<sup>10</sup>San Carlo Borromeo Hospital, Milano, Italy

<sup>11</sup>Valtellina e Valchiavenna Hospital, Sondrio, Italy

<sup>12</sup>Valtellina e Valchiavenna Hospital, Sondalo, Italy

<sup>13</sup>San Pietro Hospital, Roma, Italy

<sup>14</sup>Legnano Hospital, Legnano, Italy

<sup>15</sup>Azienda Ospedaliera Universitaria, Sassari, Italy

Supplementary Figure S1: CONSORT

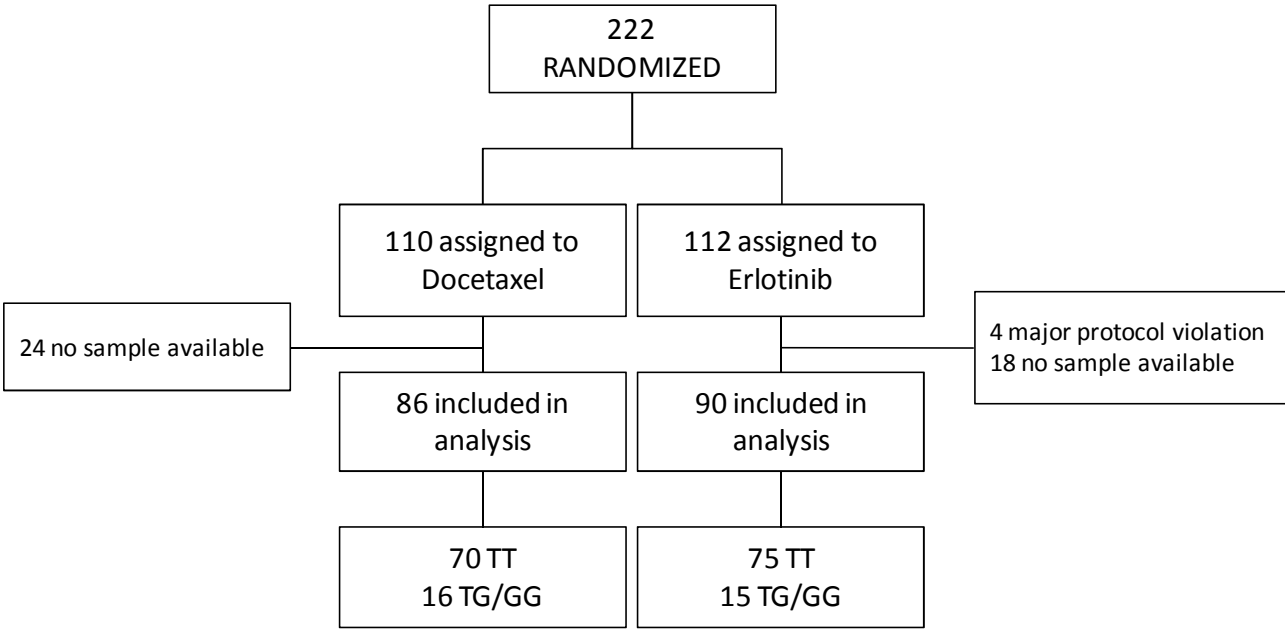

Supplementary Figure S2: Kaplan-Meier curves reporting OS (upper panels) and PFS (lower panels) in docetaxel (panels A and B) and erlotinib (panels C and D) arm according to genotypes.

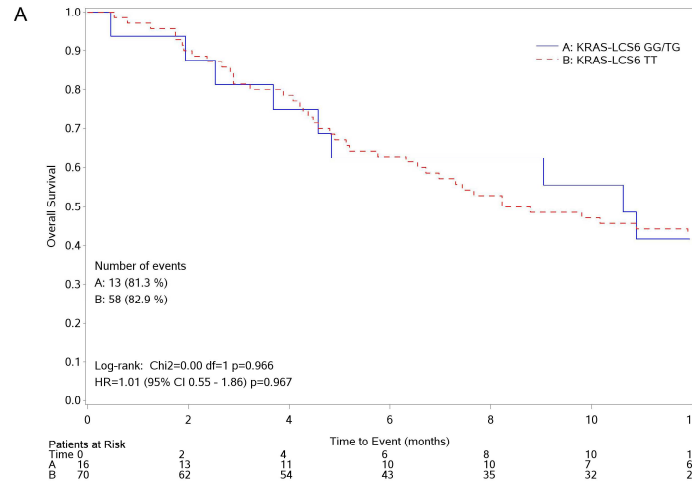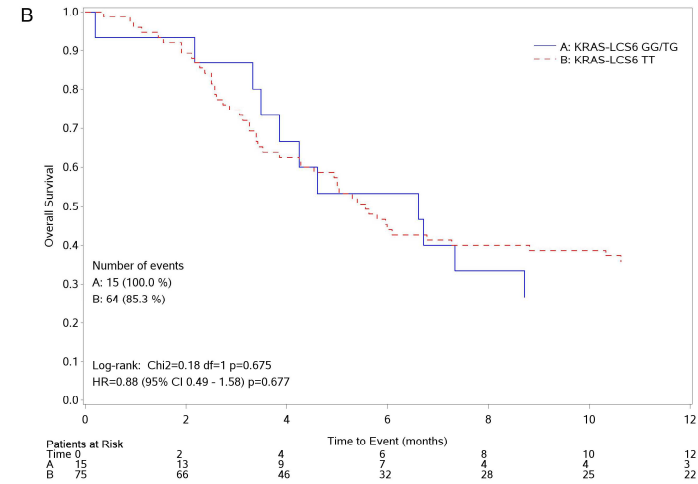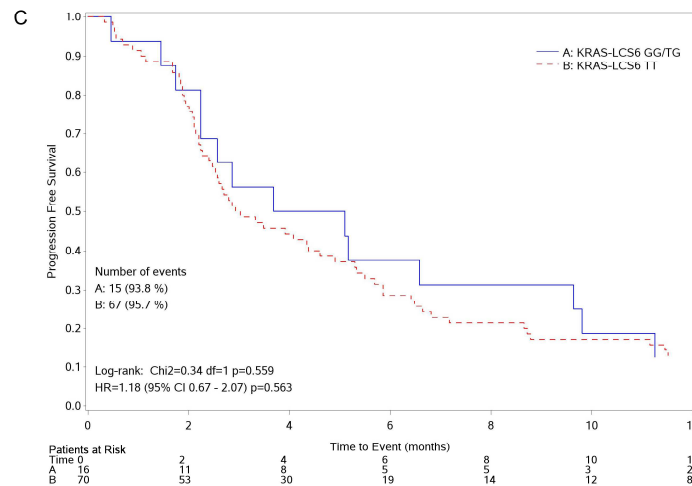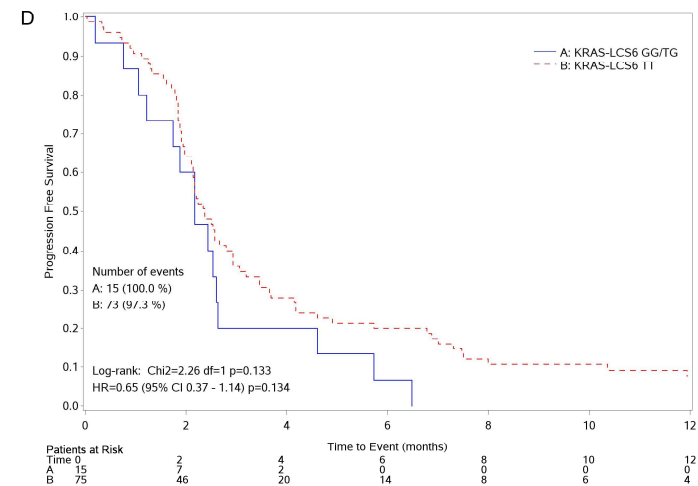

Supplement: srep16331-s1.pdf [file srep16331-s1.pdf]
